# Supplementary material
Source: publisher figshare collection journal article supplement (https://acs.figshare.com/ndownloader/files/4728670)
Supplement: Supplementary file 1 [file 4728670]

## **SUPPLEMENTARY MATERIALS**

### **Carbon and Nitrogen Isotope Variations in Tree-Rings as Records of Perturbations in Regional Carbon and Nitrogen Cycles**

**Andrew R. Bukata and T. Kurtis Kyser**

**7 Pages**

**2 Figures**

**3 Tables**

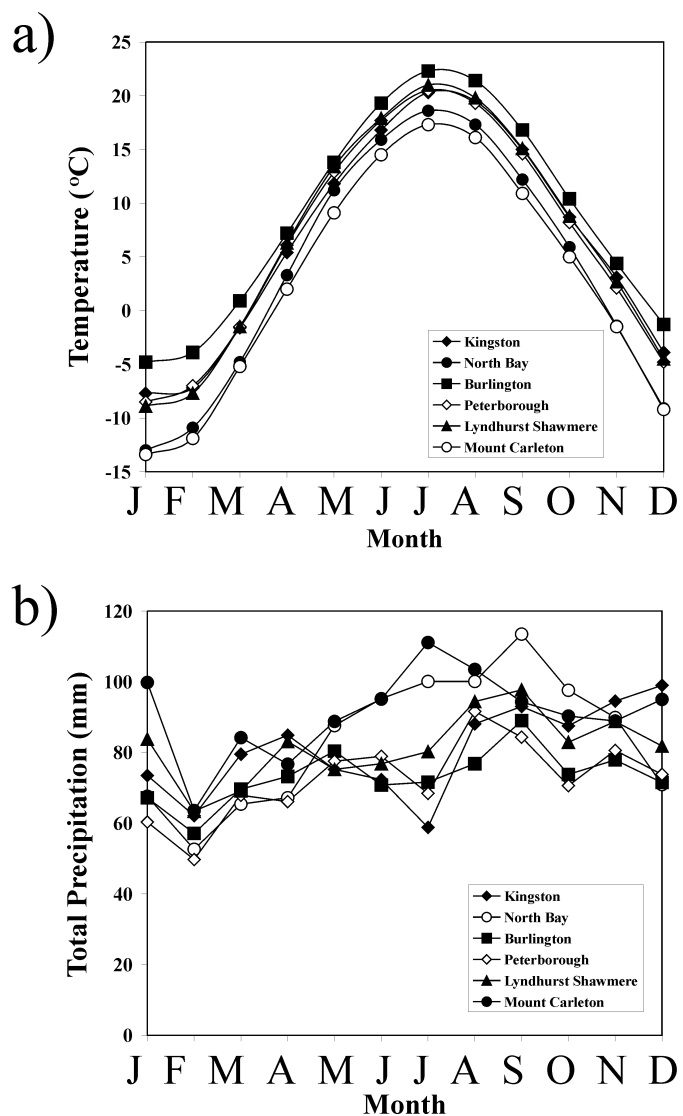

**Figure S1.** Meteorological data from the Meteorological Service of Canada. Lyndhurst Shawmere is the closest station to the Lake Opinicon site, and Mount Carleton is the closest station to the Murray Brook, NB site. Data are average (1971-1991) monthly total precipitation.

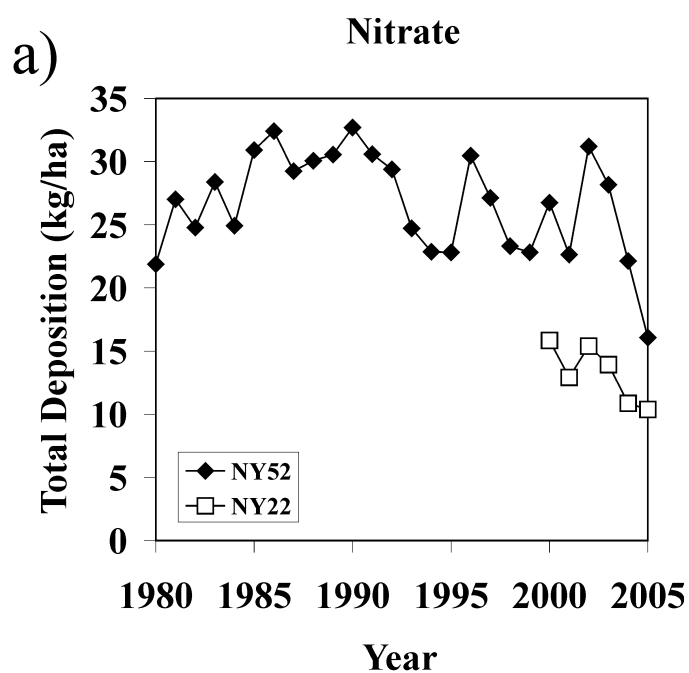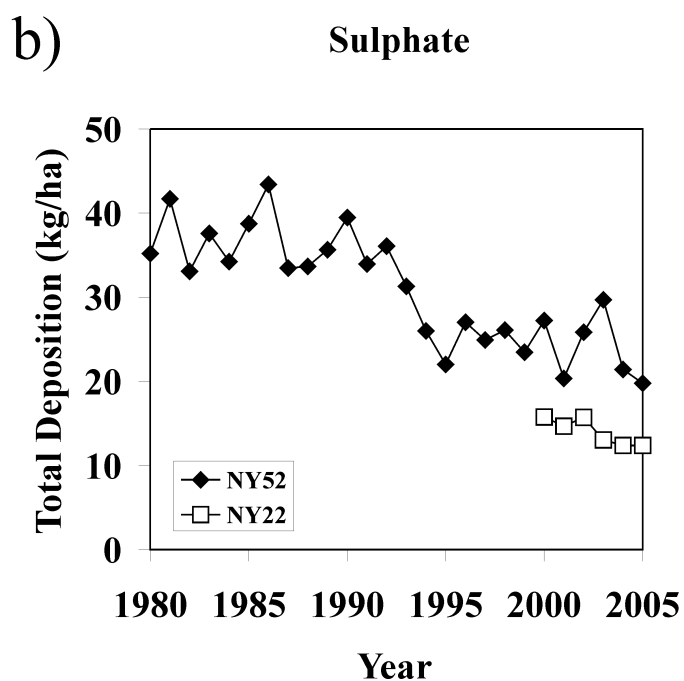

**Figure S2.** Nitrate (a) and Sulphate (b) total deposition data for sites NY52 and NY22 from the National Atmospheric Deposition Program monitoring sites (National Atmospheric Deposition Program (NRSP-3). 2006. NADP Program Office, Illinois State Water Survey, 2204 Griffith Dr., Champaign, IL 61820).

**Table S1a.** Spearman Rank Correlation Table for nitrogen isotope data since 1860. Data has been smoothed with a 5-point moving average prior to analysis. The top number is the Spearman rank coefficient ( $r_s$ ), the bottom number is the corresponding p-value (2-tailed).

|                | Ontario West     |                  |                 | Ontario East and New Brunswick |                 |                |               |
|----------------|------------------|------------------|-----------------|--------------------------------|-----------------|----------------|---------------|
|                | Burlington       | Peterborough     | North Bay       | L. Opinicon                    | Kingston North  | Kingston East  | New Brunswick |
| Burlington     | 1                |                  |                 |                                |                 |                |               |
| Peterborough   | 0.298<br>0.034   | 1                |                 |                                |                 |                |               |
| North Bay      | 0.728<br><0.0001 | 0.384<br>0.009   | 1               |                                |                 |                |               |
| L. Opinicon    | 0.310<br>0.027   | 0.334<br>0.015   | 0.392<br>0.007  | 1                              |                 |                |               |
| Kingston North | 0.046<br>0.749   | 0.684<br><0.0001 | 0.178<br>0.222  | 0.152<br>0.263                 | 1               |                |               |
| Kingston East  | 0.030<br>0.834   | 0.577<br><0.0001 | 0.071<br>0.631  | 0.449<br><0.002                | 0.296<br>0.029  | 1              |               |
| New Brunswick  | 0.054<br>0.734   | 0.226<br>0.144   | -0.155<br>0.322 | 0.013<br>0.936                 | -0.254<br>0.103 | 0.286<br>0.064 | 1             |

**Table S1b.** Spearman Rank Correlation Table for nitrogen isotope data since 1945. Data has been smoothed with a 5-point moving average prior to analysis. The top number is the Spearman rank coefficient ( $r_s$ ), the bottom number is the corresponding p-value (2-tailed).

|                | Ontario West     |                  |                  | Ontario East and New Brunswick |                 |                |               |
|----------------|------------------|------------------|------------------|--------------------------------|-----------------|----------------|---------------|
|                | Burlington       | Peterborough     | North Bay        | L. Opinicon                    | Kingston North  | Kingston East  | New Brunswick |
| Burlington     | 1                |                  |                  |                                |                 |                |               |
| Peterborough   | 0.513<br>0.008   | 1                |                  |                                |                 |                |               |
| North Bay      | 0.725<br><0.002  | 0.799<br><0.0001 | 1                |                                |                 |                |               |
| L. Opinicon    | 0.635<br><0.002  | 0.743<br><0.0001 | 0.785<br><0.0001 | 1                              |                 |                |               |
| Kingston North | 0.578<br>0.003   | 0.779<br><0.0001 | 0.713<br><0.002  | 0.510<br>0.008                 | 1               |                |               |
| Kingston East  | 0.210<br>0.276   | 0.543<br>0.004   | 0.277<br>0.153   | 0.266<br>0.162                 | 0.349<br>0.070  | 1              |               |
| New Brunswick  | -0.694<br><0.002 | -0.518<br>0.006  | -0.653<br><0.002 | -0.532<br>0.005                | -0.545<br>0.005 | 0.116<br>0.542 | 1             |

**Table S2.** Spearman Rank Correlation Table for carbon isotope data since 1860. Data has been smoothed with a 5-point moving average prior to analysis. The top number is the Spearman rank coefficient ( $r_s$ ), the bottom number is the corresponding p-value (2-tailed).

|                | Ontario West     |                   |                  | Ontario East and New Brunswick |                  |                 |               |
|----------------|------------------|-------------------|------------------|--------------------------------|------------------|-----------------|---------------|
|                | Burlington       | Peterborough      | North Bay        | L. Opinicon                    | Kingston North   | Kingston East   | New Brunswick |
| Burlington     | 1                |                   |                  |                                |                  |                 |               |
| Peterborough   | 0.317<br>0.019   | 1                 |                  |                                |                  |                 |               |
| North Bay      | 0.485<br>0.002   | 0.670<br><0.0001  | 1                |                                |                  |                 |               |
| L. Opinicon    | 0.434<br><0.002  | 0.420<br><0.002   | 0.582<br><0.002  | 1                              |                  |                 |               |
| Kingston North | 0.725<br><0.0001 | 0.348<br>0.011    | 0.701<br><0.0001 | 0.598<br><0.0001               | 1                |                 |               |
| Kingston East  | 0.558<br><0.0001 | 0.594<br><0.0001  | 0.576<br><0.002  | 0.619<br><0.0001               | 0.711<br><0.0001 | 1               |               |
| New Brunswick  | -0.407<br>0.011  | -0.708<br><0.0001 | -0.415<br>0.011  | 0.044<br>0.787                 | -0.129<br>0.424  | -0.283<br>0.073 | 1             |

**Table S3a.** Spearman Rank Correlation Table for relationship between carbon and nitrogen isotope data since 1860. Data has been smoothed with a 5-point moving average prior to analysis.

|                                      | Site           | Spearman Rank Coefficient ( $r_s$ ) | p-value (2-tailed) |
|--------------------------------------|----------------|-------------------------------------|--------------------|
| Ontario West                         | Burlington     | 0.465                               | <0.002             |
|                                      | Peterborough   | 0.533                               | <0.002             |
|                                      | North Bay      | 0.496                               | <0.002             |
| Ontario East<br>And<br>New Brunswick | L. Opinicon    | 0.552                               | <0.0001            |
|                                      | Kingston North | 0.388                               | 0.004              |
|                                      | Kingston East  | 0.336                               | 0.008              |
|                                      | New Brunswick  | -0.427                              | 0.007              |

**Table S3b.** Spearman Rank Correlation Table for relationship between carbon and nitrogen isotope

ata since 1945. Data was not smoothed prior to analysis.

|                                | Site           | Spearman Rank Coefficient ( $r_s$ ) | p-value (2-tailed) |
|--------------------------------|----------------|-------------------------------------|--------------------|
| Ontario West                   | Burlington     | 0.281                               | 0.049              |
|                                | Peterborough   | 0.433                               | <0.002             |
|                                | North Bay      | 0.372                               | 0.019              |
| Ontario East and New Brunswick | L. Opinicon    | 0.401                               | 0.003              |
|                                | Kingston North | 0.310                               | 0.023              |
|                                | Kingston East  | 0.164                               | 0.201              |
|                                | New Brunswick  | -0.140                              | 0.379              |
